# Supplementary material
Source: PubMed Central journal article supplement (PMC4127928)
Supplement: supp_mol.114.093070_Supplemental_Materials_93070.pdf [file supp_mol.114.093070_Supplemental_Materials_93070.pdf]

**Supplemental Material for:**

**Molecular Pharmacology: MOL #93070**

**Identification and characterization of novel inhibitors of mammalian aspartyl  
aminopeptidase**

Yuanyuan Chen, Hong Tang, William Seibel, Ruben Papoian, Ki Oh, Xiaoyu Li, Jianye Zhang,

Marcin Golczak, Krzysztof Palczewski and Philip D. Kiser

**Supplementary Figure 1. Purification of DNPEP and the HTS assay optimization.** A total of 12 mg of DNPEP was purified from 3 L of T7 Express *E. coli* culture induced with 20  $\mu$ M IPTG. DNPEP was stored at 1.3 mg/mL in 10 mM Tris-HCl, pH 8.0, 300 mM NaCl and 10% glycerol, as 1 mL aliquots. **A)** A Coomassie Blue-stained SDS-PAGE gel of purified DNPEP. **B)** Fluorescence intensity ( $E_{ex}/E_{em} = 380 \text{ nm}/460 \text{ nm}$ ) versus AMC concentration curve showed a linear correlation. **C)** The steady-state kinetic parameters for DNPEP-catalyzed Asp-AMC hydrolysis showed the screening concentration of Asp-AMC at 250  $\mu$ M is greater than 3x the  $K_m$  (80.9  $\mu$ M) value. **D)** The presence of DMSO in the Asp-AMC hydrolysis assay showed no effect on DNPEP activity up to a 1% volume ratio. The red dot indicates the concentration used in the HTS **E)** DNPEP concentration in the Asp-AMC hydrolysis assay was optimized and 80 nM was used as final screening concentration in each well. **F)** Time course of fluorescence generated by Asp-AMC hydrolysis (in triplicate) showed linear correlation of fluorescence with time, suggesting the two-point reading (at  $t=0$  and 30 min) was reliable for calculation of reaction rate. **G)** Minimal day-to-day and plate-to-plate variability demonstrated the reliability of the Asp-AMC hydrolysis assay. **H)** Two freeze-thaw cycles or up to 7.5 hours of incubation at 4  $^{\circ}$ C did not affect DNPEP activity in the Asp-AMC activity assay demonstrating the enzyme stability.

**Supplementary Figure 2. The pre-test of the activity of 33 compounds selected by virtual screening in the Asp-AMC hydrolysis assay.** **A)** Chart of DNPEP enzymatic activity in the presence of tested compounds. 100% activity refers to the activity of the control sample with enzyme only. Three compounds inhibited the reaction by more than 50% compared to enzyme alone. **B**, **C** and **D** are the dose-response curves of compounds 1001928, 263560 and 413019 identified as DNPEP inhibitors. Their chemical structures and  $IC_{50}$  values are shown in the insets of each dose response chart.

**Supplementary Figure 3. Activity summary of neighboring molecules to compounds 241320 and 347749.** Compounds labeled in red are DNPEP inhibitors with activity score  $\leq -60$  %. The activity score in the Asp-AMC hydrolysis assay and ID number of each compound are shown under its chemical structure.  $IC_{50}$  values for compounds exhibiting  $\leq -60$  % inhibition of DNPEP-catalyzed Asp-AMC hydrolysis are listed to the right of the respective activity scores.

**Supplementary Figure 4. Activity summary of neighboring molecules to compounds 98897,769078 and 702610.** Compounds labeled in red are DNPEP inhibitors with activity scores  $\leq -60$  %. The activity score in the Asp-AMC hydrolysis assay and ID number of each compound are shown under its chemical structure.  $IC_{50}$  values for compounds exhibiting  $\leq -60$  % inhibition of DNPEP-catalyzed Asp-AMC hydrolysis are listed to the right of the respective activity scores.

**Supplementary Figure 5. Chemical structures of two Pfm18AAP inhibitors. A)** The top lead inhibitor from the Pfm18AAP HTS (Schoenen et al., 2010). **B)** Base compound for SAR analysis in the Pfm18AAP HTS. The three variable regions in the SAR analysis are delineated by grey rectangles.

# Supplementary Figure 1

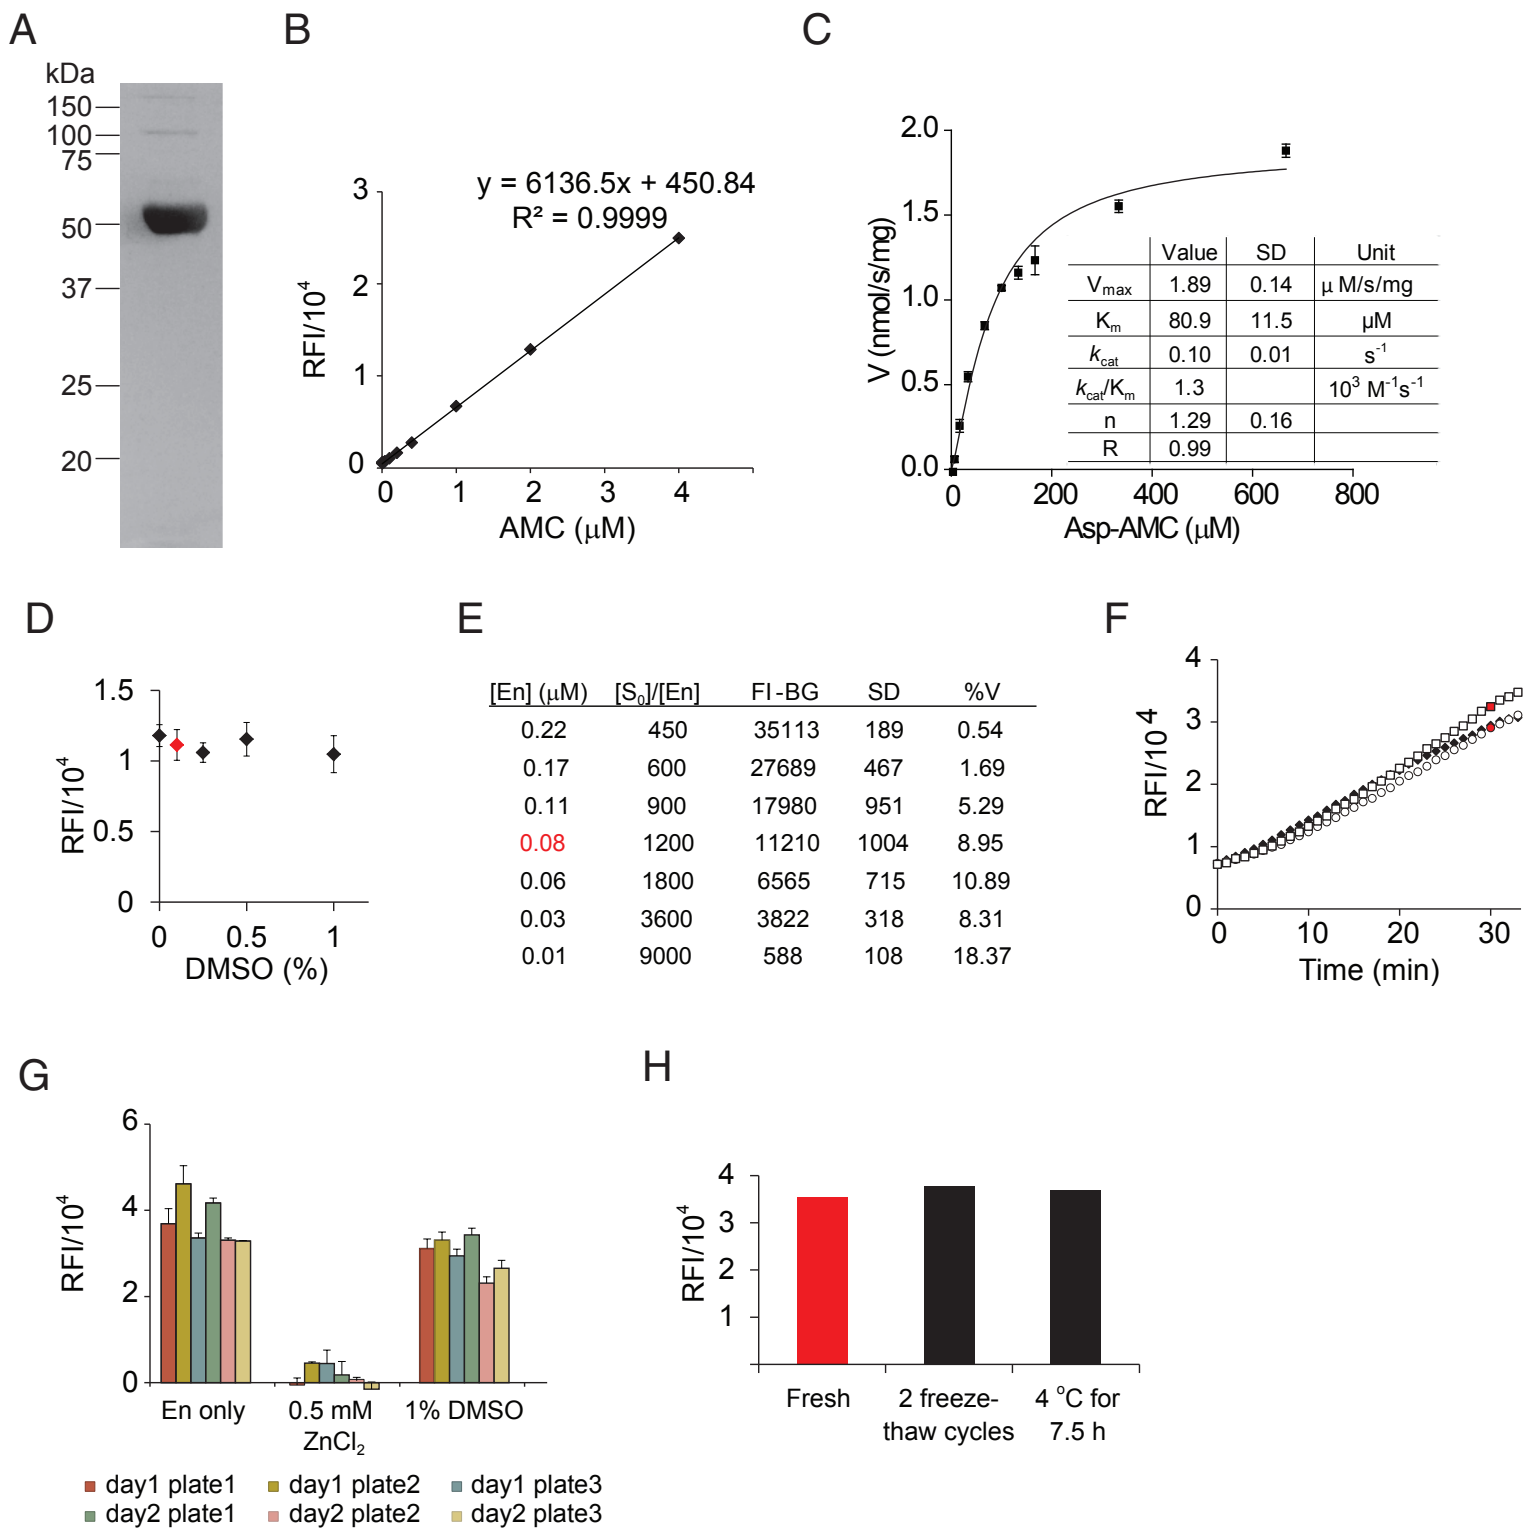

# Supplementary Figure 2

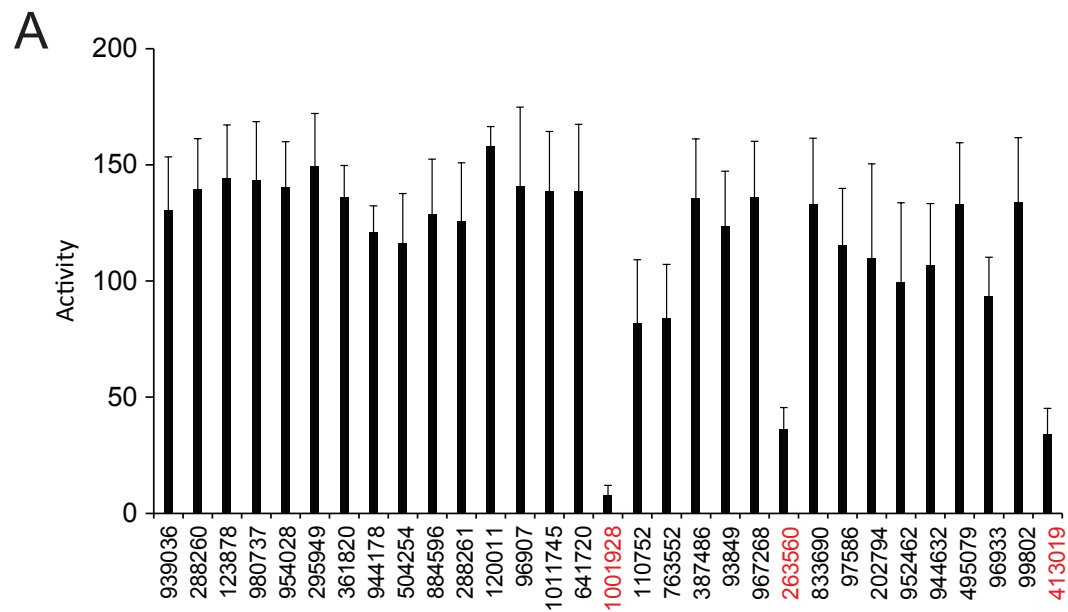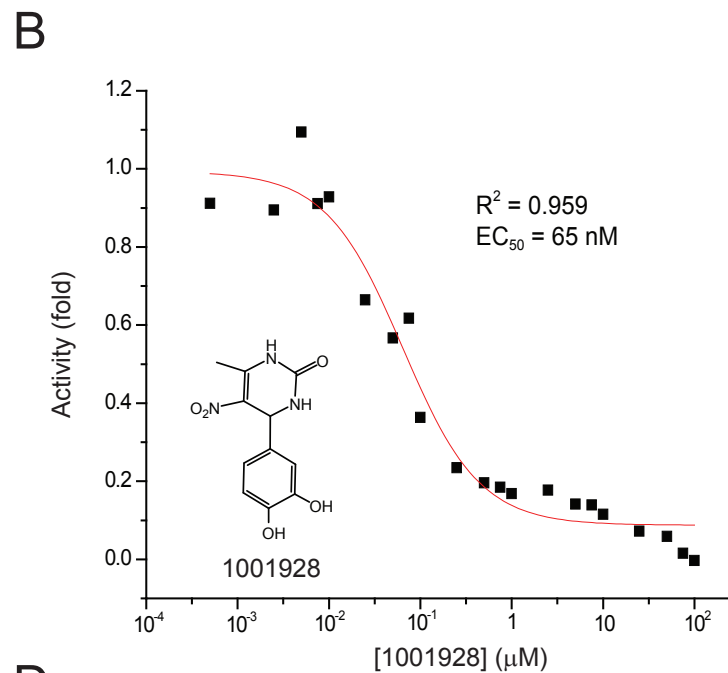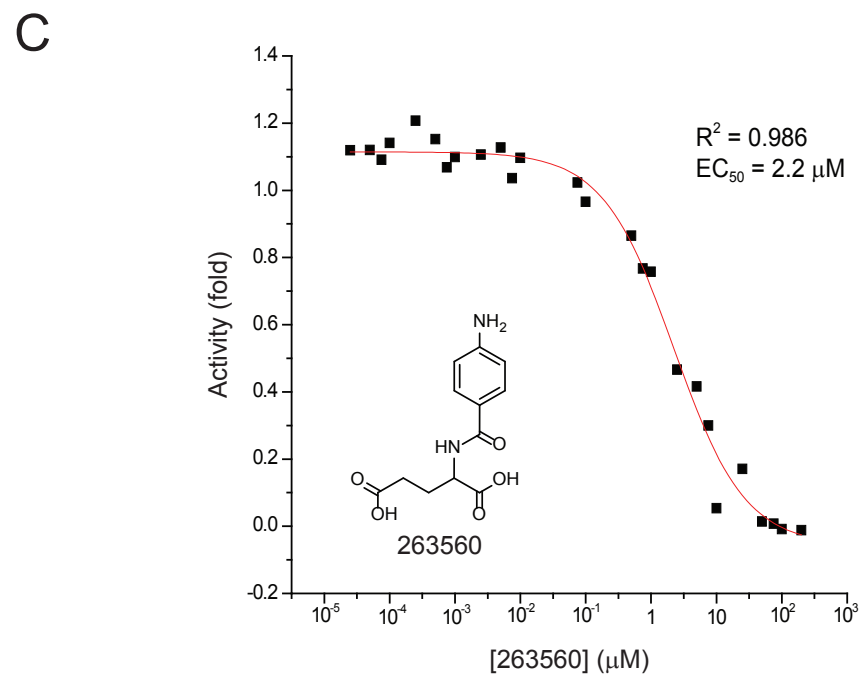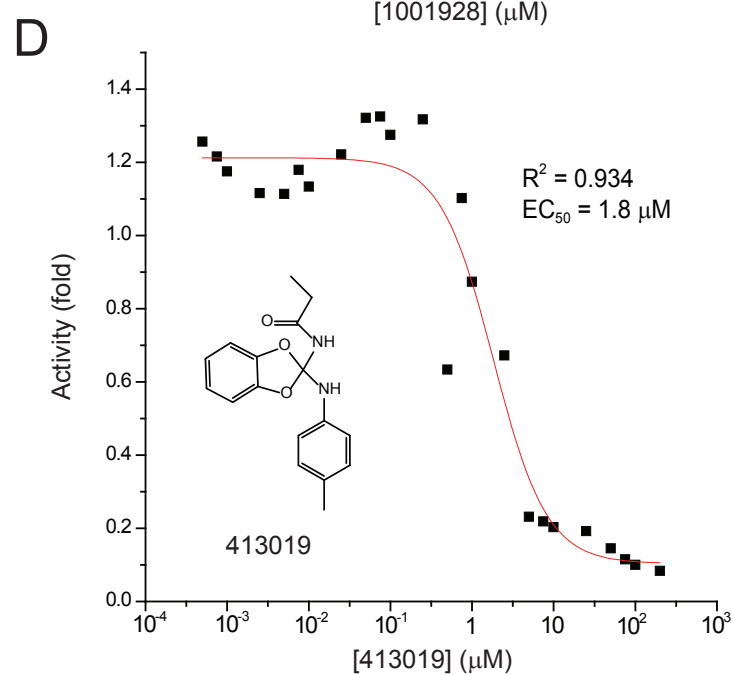

# Supplementary Figure 3

|                                             |                                                                                     |                                                                                     |                                                                                      |                                                    |                                                                                       |                                                                                       |                                                                                       |
|---------------------------------------------|-------------------------------------------------------------------------------------|-------------------------------------------------------------------------------------|--------------------------------------------------------------------------------------|----------------------------------------------------|---------------------------------------------------------------------------------------|---------------------------------------------------------------------------------------|---------------------------------------------------------------------------------------|
| Seed                                        | 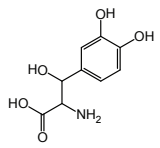   |                                                                                     |                                                                                      | Seed                                               |    |                                                                                       |                                                                                       |
|                                             | 241320, -74.5, 4.4 $\mu$ M                                                          |                                                                                     |                                                                                      |                                                    | 347749, -72.3, 2.0 $\mu$ M                                                            |                                                                                       |                                                                                       |
| Deletion of 3-hydroxyl                      |    |    |                                                                                      | Deletion of amine and hydroxyl/ring substitution   |    |    |    |
|                                             | 503659, -86, 1.0 $\mu$ M                                                            | 247266, -61, 8.5 $\mu$ M                                                            |                                                                                      |                                                    | 497467, -9                                                                            | 963622, 2                                                                             | 947750, -6                                                                            |
| Deletion of carboxylate and alkylation      |    |    |    | Change extension position on rhodanine ring        |    | Deletion of carboxylate                                                               |                                                                                       |
|                                             | 247275, -75, 9.3 $\mu$ M                                                            | 247255, -42                                                                         | 361558, -2                                                                           |                                                    | 124943, -2                                                                            |                                                                                       |                                                                                       |
|                                             |    |    |                                                                                      |                                                    |    |    |    |
|                                             | 517092, -15                                                                         | 104441, 0                                                                           |                                                                                      |                                                    | 774463, -18                                                                           | 374608, -26                                                                           | 856595, -20                                                                           |
| Side chain substitutions                    |   |   |   | Threonine substitution with amide                  |   |   |   |
|                                             | 93984, -75, 3.80 $\mu$ M                                                            | 9226, 47                                                                            | 300234, -10                                                                          |                                                    | 767433, -6                                                                            | 951173, -1                                                                            | 951174, -11                                                                           |
| Halogen addition or replacement on catechol |  |  |  | Threonine substitution with amide plus carboxylate |  |  |                                                                                       |
|                                             | 520266, -15                                                                         | 130024, -4                                                                          | 361522, -29                                                                          |                                                    | 948555, 1                                                                             | 963980, -3                                                                            |                                                                                       |
| Amine replacement of catechol hydroxyl      |  |                                                                                     |                                                                                      | Other modifications                                |  |  |  |
|                                             | 281488, -1                                                                          |                                                                                     |                                                                                      |                                                    | 779262, -8                                                                            | 279700, -54                                                                           | 759849, -4                                                                            |

# Supplementary Figure 4

|                                                     |                                                                                                                       |                                                                                                                       |                                                                                                                       |                                                                                                                      |                                                                                                    |                                                                                                       |                                                                                                      |                                                                                                           |
|-----------------------------------------------------|-----------------------------------------------------------------------------------------------------------------------|-----------------------------------------------------------------------------------------------------------------------|-----------------------------------------------------------------------------------------------------------------------|----------------------------------------------------------------------------------------------------------------------|----------------------------------------------------------------------------------------------------|-------------------------------------------------------------------------------------------------------|------------------------------------------------------------------------------------------------------|-----------------------------------------------------------------------------------------------------------|
| Seeds                                               | 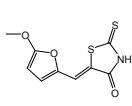<br>98897, -96, 0.54 $\mu\text{M}$   | <br>769078, -64, 5.8 $\mu\text{M}$   | <br>702610, -84, 2.4 $\mu\text{M}$   |                                                                                                                      |                                                                                                    |                                                                                                       |                                                                                                      |                                                                                                           |
| Isomerization and/or change in alkene linker length | <br>96155, -71, 8.6 $\mu\text{M}$    | <br>994193, -76, 4.3 $\mu\text{M}$   | <br>96379, -55                       |                                                                                                                      | <br>938713, -16 | <br>782598, 0      | <br>925567, -16   |                                                                                                           |
|                                                     | <br>381466, -69, 10 $\mu\text{M}$    | <br>96292, -78, 2.2 $\mu\text{M}$    | <br>98896, -78, 1.2 $\mu\text{M}$    | <br>123141, -73, 2.2 $\mu\text{M}$  | Non-polar substitution on rhodanine or triazine                                                    | <br>920776, -32    | <br>917820, -24   | <br>526840, 0          |
| Polar substitution on rhodanine nitrogen            | <br>910179, -73, 7.1 $\mu\text{M}$   | <br>966958, -70, 9.4 $\mu\text{M}$   | <br>521685, -65, 9.8 $\mu\text{M}$   |                                                                                                                      | <br>374601, -52 | <br>771512, -39    | <br>95325, -39    |                                                                                                           |
|                                                     | <br>943988, -61, 11 $\mu\text{M}$    | <br>994188, -78, 7.0 $\mu\text{M}$   |                                                                                                                       |                                                                                                                      | Loss of furan ring and alkene linker                                                               | <br>966697, -57    | <br>259097, -15   | <br>962876, 4          |
| Rhodanine or triazine ring substitution             | <br>946097, -62, 7.2 $\mu\text{M}$ | <br>778159, -67, N/A               | <br>394747, -52                    |                                                                                                                      | Alkylation of alkene linker or rhodanine nitrogen and isomerization                                | <br>921127, -4   | <br>926399, -26 | <br>921314, -1       |
|                                                     | <br>96270, -52                     | <br>492188, -4                     | <br>97417, -39                     | <br>96409, -72, 4.3 $\mu\text{M}$ |                                                                                                    | <br>980083, -17  | <br>496193, -24 | <br>240994, -18      |
| Furan ring derivatization                           | <br>770885, -62, 2.3 $\mu\text{M}$ | <br>911299, -62, 1.7 $\mu\text{M}$ | <br>98809, -73, 17 $\mu\text{M}$   |                                                                                                                      | Thiophene substitution for furan                                                                   | <br>1001827, -27 | <br>917362, -17 | <br>964792, -20      |
|                                                     | <br>98875, -62, 13 $\mu\text{M}$   | <br>769080, -71, 13 $\mu\text{M}$  | <br>1001360, -73, 18 $\mu\text{M}$ | <br>98871, -59                    |                                                                                                    | <br>1002814, -7  | <br>501118, -19 |                                                                                                           |
|                                                     | <br>98894, -5                      | <br>370242, -21                    | <br>100812, 6                      | <br>95394, -58                    | Pyridine substitution for furan                                                                    | <br>240991, -35  | <br>702295, -8  |                                                                                                           |
|                                                     | <br>769641, -88, 3.0 $\mu\text{M}$ | <br>98866, -18                     | <br>397172, -59                    | <br>390117, -18                   | <br>954647, -57 | Other substitutions for furan                                                                         | <br>526103, -2  | <br>381558, -27, N/A |

# Supplementary Figure 5

A

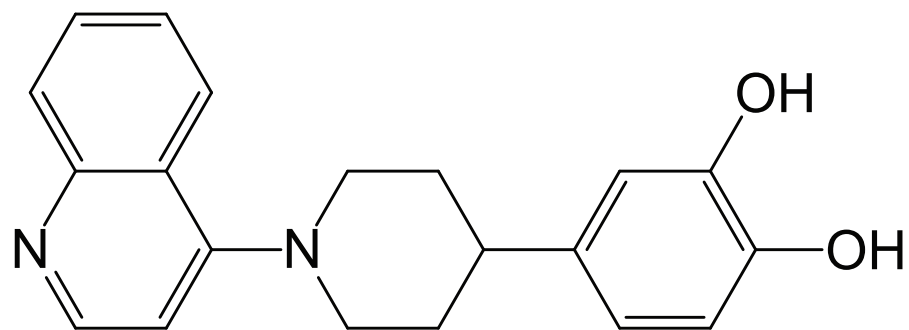

ML369

B

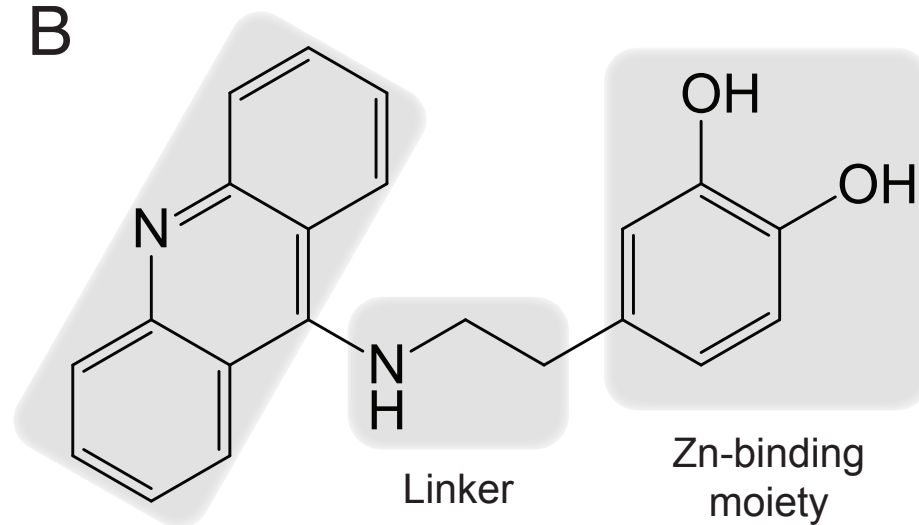

Heterocycle

Linker

Zn-binding moiety

CID 23724194



**Supplementary Table 1.** The effects of 26,386 tested compounds (12.3  $\mu$ M) on DNPEP activity by the HTS (Asp-AMC hydrolysis assay)

| <b>% Activity</b>  | <b># Compounds</b> | <b>Cumulative # compounds</b> |
|--------------------|--------------------|-------------------------------|
| <b>-90 to -100</b> | <b>15</b>          | <b>15</b>                     |
| <b>-80 to -90</b>  | <b>65</b>          | <b>80</b>                     |
| <b>-70 to -80</b>  | <b>147</b>         | <b>227</b>                    |
| <b>- 60 to -70</b> | <b>170</b>         | <b>397</b>                    |
| -50 to -60         | 168                | 565                           |
| -40 to -50         | 281                | 846                           |
| -30 to -40         | 526                | 1,372                         |
| 0 to -30           | 12,180             | 13,552                        |
| 20 to 0            | 11,508             | 25,060                        |
| 30 to 20           | 1,104              | 26,164                        |
| <b>40 to 30</b>    | <b>173</b>         | <b>26,337</b>                 |
| <b>50 to 40</b>    | <b>33</b>          | <b>26,370</b>                 |
| <b>60 to 50</b>    | <b>7</b>           | <b>26,377</b>                 |
| <b>70 to 60</b>    | <b>2</b>           | <b>26,379</b>                 |
| <b>80 to 70</b>    | <b>5</b>           | <b>26,384</b>                 |
| <b>90 to 80</b>    | <b>2</b>           | <b>26,386</b>                 |

**Supplementary Table 2.** Summary of quality control parameters (signal/background ratio (S/B ratio) and Z'-factor) for DNPEP primary HTS.

| <b>S/B Ratio</b> |            | <b>Z'-Factor</b> |             |
|------------------|------------|------------------|-------------|
| Mean $\pm$ S.D.  | Range      | Mean $\pm$ S.D.  | Range       |
| 3134 $\pm$ 5091  | 346 – 3638 | 0.74 $\pm$ 0.03  | 0.66 – 0.80 |

**Supplementary Table 3.** Summary of compound effects (12.3  $\mu$ M) on DNPEP activity in the Asp-AMC hydrolysis HTS performed in triplicate.

| <b>% Activity</b>   | <b># Compounds</b> | <b>Cumulative # compounds</b> |
|---------------------|--------------------|-------------------------------|
| <b>-90 to -100</b>  | <b>18</b>          | <b>18</b>                     |
| <b>-80 to -90</b>   | <b>91</b>          | <b>109</b>                    |
| <b>-70 to -80</b>   | <b>120</b>         | <b>229</b>                    |
| <b>- 65 to -70</b>  | <b>34</b>          | <b>263</b>                    |
| <b>- 60 to - 65</b> | <b>19</b>          | <b>282</b>                    |
| -50 to -60          | 21                 | 303                           |
| -40 to -50          | 11                 | 314                           |
| -30 to -40          | 19                 | 333                           |
| 0 to -30            | 143                | 476                           |
| 20 to 0             | 103                | 579                           |
| <b>30 to 20</b>     | <b>4</b>           | <b>583</b>                    |
| <b>50 to 40</b>     | <b>1</b>           | <b>584</b>                    |
| <b>80 to 70</b>     | <b>1</b>           | <b>585</b>                    |
| <b>100 to 90</b>    | <b>1</b>           | <b>586</b>                    |

**Supplementary Table 4.** Summary of quality control parameters (signal/background ratio (S/B ratio) and Z'-factor) for the Asp-AMC hydrolysis HTS performed in triplicate.

| <b>S/B Ratio</b> |            | <b>Z'-Factor</b> |             |
|------------------|------------|------------------|-------------|
| Mean $\pm$ S.D.  | Range      | Mean $\pm$ S.D.  | Range       |
| 1321 $\pm$ 1337  | 257 – 3793 | 0.79 $\pm$ 0.05  | 0.71 – 0.87 |

**Supplementary Table 5.** Summary of 280 DAP inhibitors IC<sub>50</sub> and 7 activators AC<sub>50</sub> values ( $\mu$ M) obtained by Asp-AMC hydrolysis dose-response HTS assays

| <b>IC<sub>50</sub> (<math>\mu</math>M)</b> | <b># Compounds</b> | <b>Cumulative # compounds</b> |
|--------------------------------------------|--------------------|-------------------------------|
| 0 to 1                                     | 36                 | 36                            |
| 1 to 10                                    | 219                | 255                           |
| 10 to 20                                   | 25                 | 280                           |
| <b>AC<sub>50</sub> (<math>\mu</math>M)</b> | <b># Compounds</b> | <b>Cumulative # compounds</b> |
| 1 to 10                                    | 1                  | 1                             |
| 10 to 20                                   | 1                  | 2                             |
| 20 to 100                                  | 1                  | 3                             |
| > 100                                      | 4                  | 7                             |

**Supplementary Table 6.** Summary of quality control parameters (signal/background ratio (S/B ratio) and Z'-factor) for the DNPEP dose-response screen.

| <b>S/B Ratio</b> |             | <b>Z'-Factor</b> |             |
|------------------|-------------|------------------|-------------|
| Mean $\pm$ S.D.  | Range       | Mean $\pm$ S.D.  | Range       |
| 3029 $\pm$ 4824  | 418 – 23610 | 0.78 $\pm$ 0.03  | 0.72 – 0.83 |

**Supplementary Table 7.** Summary of hit effects (10  $\mu$ M) on DNPEP activity in the orthogonal, Ang II hydrolysis screen.

| <b>Activity (%)</b> | <b>Number of Compounds</b> | <b>Cumulative Number of Compounds</b> |
|---------------------|----------------------------|---------------------------------------|
| -100 to -90         | 1                          | 1                                     |
| -90 to -80          | 5                          | 6                                     |
| -80 to -70          | 2                          | 8                                     |
| -70 to -60          | 5                          | 13                                    |
| -60 to -50          | 22                         | 35                                    |
| -50 to -40          | 28                         | 63                                    |
| -40 to -30          | 22                         | 85                                    |
| -30 to -20          | 48                         | 133                                   |
| -20 to 20           | 149                        | 282                                   |
| 20 to 25            | 1                          | 283                                   |

**Supplementary Table 8.** Summary of quality control parameters (S/B ratio and Z'-factor) for DNPEP orthogonal, Ang II hydrolysis screen.

| <b>S/B Ratio</b> |           | <b>Z'-Factor</b> |             |
|------------------|-----------|------------------|-------------|
| Mean $\pm$ S.D.  | Range     | Mean $\pm$ S.D.  | Range       |
| 185 $\pm$ 75     | 103 – 339 | 0.89 $\pm$ 0.05  | 0.82 – 0.98 |

**Supplementary Table 9.** Summary of orthogonal triplicate confirmation screen in a single experiment. Each hit was tested in triplicate at 10  $\mu$ M concentration in the Ang II hydrolysis assay. Quality control statistics are listed at the bottom of the table.

| % Activity  | # Compounds | Cumulative # compounds |      |
|-------------|-------------|------------------------|------|
|             |             |                        |      |
| -100 to -90 | 13          | <b>13</b>              |      |
| -90 to -80  | 4           | <b>17</b>              |      |
| -80 to -70  | 2           | <b>19</b>              |      |
| -70 to -60  | 1           | <b>20</b>              |      |
| -60 to -50  | 6           | <b>26</b>              |      |
| -50 to -40  | 1           | 27                     |      |
| -40 to -30  | 1           | 28                     |      |
| -30 to -20  | 0           | 28                     |      |
| -20 to 20   | 4           | 32                     |      |
| Z'          | 0.63        | S/B                    | 21.9 |

**Supplementary Table 10.** Quality control parameters (S/B ratios and Z') for the dose-response Ang II hydrolysis screen.

| S/B Ratio       |          | Z'-Factor       |             |
|-----------------|----------|-----------------|-------------|
| Mean $\pm$ S.D. | Range    | Mean $\pm$ S.D. | Range       |
| 248 $\pm$ 104   | 69 – 459 | 0.87 $\pm$ 0.09 | 0.55 – 0.94 |

**Supplementary Table 11.** Quality control parameters (S/B ratios and Z') for the DNPEP neighboring search and activity test with the Asp-AMC hydrolysis assay.

| S/B Ratio |       | Z'-Factor |
|-----------|-------|-----------|
| Exp 1.    | 143.8 | 0.96      |
| Exp 2.    | 151.1 | 0.65      |
